# Supplementary material
Source: MDPI journal article supplement (https://www.mdpi.com/1999-4907/13/9/1434)
Supplement: s1 [file s1]

## Supplementary Materials

**Supporting Information to the paper:** Valerio, M., Gazol, A., Puy, J., Ibáñez, R., Different taxonomic and functional indices complement the understanding of herb-layer community assembly patterns in a southern-limit temperate forest. *Forests*.

**Author for correspondence:** Mercedes Valerio. Universidad de Navarra, Facultad de Ciencias, Departamento de Biología Ambiental, Calle Irunlarrea, 1, 31008, Pamplona, España. Email: mvalerio.1@alumni.unav.es

**Table S1.** List of the 52 vascular plant species studied, with their abundance in terms of frequency, life form and the mean value of the four functional traits measured (LDMC: Leaf Dry Matter Content, SLA: Specific Leaf Area, Leaf size and Plant height). Nomenclature follows Castroviejo (1986-2021).

| Taxon                                                    | Frequency<br>(max. 86) | Life form Raunkiaer | LDMC<br>(mg g <sup>-1</sup> ) | SLA<br>(mm <sup>2</sup> mg <sup>-1</sup> ) | Leaf size<br>(mm <sup>2</sup> ) | Plant height<br>(cm) |
|----------------------------------------------------------|------------------------|---------------------|-------------------------------|--------------------------------------------|---------------------------------|----------------------|
| <i>Agrostis capillaris</i> subsp. <i>capillaris</i>      | 47                     | Hemicryptophyte     | 179.4                         | 26.3                                       | 70.96                           | 19                   |
| <i>Agrostis curtisii</i>                                 | 5                      | Hemicryptophyte     | 247.6                         | 17.3                                       | 42.56                           | 21                   |
| <i>Asphodelus albus</i> subsp. <i>albus</i>              | 2                      | Geophyte            | 130.6                         | 13.2                                       | 4556.98                         | 46                   |
| <i>Athyrium filix-femina</i>                             | 31                     | Geophyte            | 173.9                         | 44.6                                       | 27454.09                        | 30                   |
| <i>Avenella flexuosa</i>                                 | 68                     | Hemicryptophyte     | 246.2                         | 18.9                                       | 80.19                           | 15                   |
| <i>Blechnum spicant</i> subsp. <i>spicant</i>            | 42                     | Hemicryptophyte     | 291.4                         | 11.8                                       | 7838.10                         | 21                   |
| <i>Brachypodium sylvaticum</i> subsp. <i>sylvaticum</i>  | 9                      | Hemicryptophyte     | 278.4                         | 18.8                                       | 367.51                          | 31                   |
| <i>Calluna vulgaris</i>                                  | 20                     | Chamaephyte         | 406.1                         | 24.3                                       | 4.00                            | 45                   |
| <i>Cardamine flexuosa</i>                                | 11                     | Hemicryptophyte     | 158.0                         | 30.2                                       | 85.86                           | 10                   |
| <i>Cardamine pratensis</i> subsp. <i>pratensis</i>       | 15                     | Hemicryptophyte     | 157.1                         | 24.0                                       | 233.34                          | 13                   |
| <i>Carex pilulifera</i> subsp. <i>pilulifera</i>         | 13                     | Hemicryptophyte     | 282.7                         | 26.2                                       | 260.31                          | 19                   |
| <i>Carex remota</i>                                      | 8                      | Hemicryptophyte     | 218.1                         | 24.8                                       | 374.79                          | 30                   |
| <i>Carex sylvatica</i> subsp. <i>sylvatica</i>           | 10                     | Hemicryptophyte     | 290.2                         | 20.8                                       | 680.13                          | 25                   |
| <i>Chrysosplenium oppositifolium</i>                     | 8                      | Hemicryptophyte     | 125.0                         | 29.8                                       | 103.56                          | 7                    |
| <i>Circaea lutetiana</i>                                 | 1                      | Geophyte            | 121.5                         | 74.0                                       | 803.59                          | 7                    |
| <i>Cytisus scoparius</i> subsp. <i>scoparius</i>         | 13                     | Nanophanerophyte    | 191.9                         | 33.1                                       | 155.94                          | 43                   |
| <i>Daboecia cantabrica</i>                               | 9                      | Chamaephyte         | 377.1                         | 17.7                                       | 55.79                           | 28                   |
| <i>Daphne laureola</i>                                   | 11                     | Nanophanerophyte    | 340.7                         | 8.3                                        | 869.70                          | 65                   |
| <i>Digitalis purpurea</i> subsp. <i>purpurea</i>         | 2                      | Hemicryptophyte     | 100.7                         | 34.1                                       | 9435.90                         | 43                   |
| <i>Dryopteris affinis</i> subsp. <i>affinis</i>          | 30                     | Hemicryptophyte     | 184.8                         | 27.2                                       | 58271.86                        | 61                   |
| <i>Erica cinerea</i>                                     | 3                      | Chamaephyte         | 376.2                         | 16.2                                       | 4.99                            | 43                   |
| <i>Erica vagans</i>                                      | 28                     | Chamaephyte         | 236.6                         | 18.2                                       | 4.96                            | 33                   |
| <i>Euphorbia amygdaloides</i> subsp. <i>amygdaloides</i> | 55                     | Chamaephyte         | 222.3                         | 29.8                                       | 393.66                          | 19                   |
| <i>Euphorbia dulcis</i>                                  | 16                     | Hemicryptophyte     | 195.0                         | 50.1                                       | 179.69                          | 10                   |
| <i>Festuca rubra</i> subsp. <i>rubra</i>                 | 21                     | Hemicryptophyte     | 233.8                         | 21.3                                       | 70.29                           | 8                    |
| <i>Hedera helix</i> subsp. <i>helix</i>                  | 76                     | Nanophanerophyte    | 303.7                         | 13.3                                       | 987.64                          | 6                    |
| <i>Helleborus viridis</i> subsp. <i>occidentalis</i>     | 10                     | Geophyte            | 188.0                         | 16.2                                       | 15534.28                        | 17                   |
| <i>Hypericum androsaemum</i>                             | 58                     | Nanophanerophyte    | 229.2                         | 33.5                                       | 2628.75                         | 43                   |
| <i>Hypericum pulchrum</i>                                | 23                     | Hemicryptophyte     | 237.6                         | 31.4                                       | 98.87                           | 25                   |
| <i>Juncus effusus</i>                                    | 3                      | Hemicryptophyte     | 227.3                         | 7.2                                        | 0.00                            | 61                   |
| <i>Lathyrus linifolius</i>                               | 13                     | Hemicryptophyte     | 257.3                         | 26.5                                       | 535.94                          | 13                   |
| <i>Luzula multiflora</i> subsp. <i>multiflora</i>        | 10                     | Hemicryptophyte     | 188.4                         | 25.0                                       | 334.79                          | 12                   |
| <i>Luzula sylvatica</i> subsp. <i>sylvatica</i>          | 23                     | Hemicryptophyte     | 222.2                         | 24.9                                       | 2297.31                         | 28                   |
| <i>Oxalis acetosella</i>                                 | 15                     | Geophyte            | 94.1                          | 70.0                                       | 528.92                          | 9                    |

| Taxon                                               | Frequency<br>(max. 86) | Life form Raunkiaer | LDMC<br>(mg g <sup>-1</sup> ) | SLA<br>(mm <sup>2</sup> mg <sup>-1</sup> ) | Leaf size<br>(mm <sup>2</sup> ) | Plant height<br>(cm) |
|-----------------------------------------------------|------------------------|---------------------|-------------------------------|--------------------------------------------|---------------------------------|----------------------|
| <i>Polystichum setiferum</i>                        | 34                     | Hemicryptophyte     | 220.2                         | 20.6                                       | 42181.61                        | 47                   |
| <i>Potentilla sterilis</i>                          | 6                      | Hemicryptophyte     | 227.9                         | 20.5                                       | 477.51                          | 7                    |
| <i>Primula acaulis</i> subsp. <i>acaulis</i>        | 4                      | Hemicryptophyte     | 115.1                         | 38.1                                       | 3288.70                         | 7                    |
| <i>Pteridium aquilinum</i> subsp. <i>aquilinum</i>  | 57                     | Geophyte            | 256.2                         | 15.8                                       | 178280.25                       | 38                   |
| <i>Ranunculus tuberosus</i>                         | 20                     | Hemicryptophyte     | 149.9                         | 21.3                                       | 838.84                          | 17                   |
| <i>Rubus ulmifolius</i>                             | 8                      | Nanophanerophyte    | 412.5                         | 13.9                                       | 3957.95                         | 36                   |
| <i>Ruscus aculeatus</i>                             | 45                     | Chamaephyte         | 442.1                         | 6.6                                        | 0.00                            | 37                   |
| <i>Saxifraga hirsuta</i> subsp. <i>hirsuta</i>      | 7                      | Hemicryptophyte     | 115.3                         | 27.5                                       | 616.53                          | 7                    |
| <i>Scilla lilio-hyacinthus</i>                      | 5                      | Geophyte            | 65.2                          | 35.2                                       | 2390.36                         | 12                   |
| <i>Scrophularia alpestris</i>                       | 1                      | Hemicryptophyte     | 131.0                         | 31.8                                       | 3003.78                         | 25                   |
| <i>Solanum dulcamara</i>                            | 1                      | Chamaephyte         | 146.4                         | 46.0                                       | 721.50                          | 36                   |
| <i>Solidago virgaurea</i>                           | 4                      | Hemicryptophyte     | 180.1                         | 29.2                                       | 1783.48                         | 13                   |
| <i>Taraxacum</i> gr. <i>officinale</i>              | 3                      | Hemicryptophyte     | 307.9                         | 45.3                                       | 1519.83                         | 9                    |
| <i>Ulex gallii</i> subsp. <i>gallii</i>             | 4                      | Nanophanerophyte    | 491.4                         | 2.8                                        | 0.00                            | 128                  |
| <i>Vaccinium myrtillus</i>                          | 8                      | Chamaephyte         | 300.7                         | 32.3                                       | 150.69                          | 12                   |
| <i>Veronica chamaedrys</i> subsp. <i>chamaedrys</i> | 32                     | Chamaephyte         | 162.8                         | 45.6                                       | 124.67                          | 6                    |
| <i>Veronica officinalis</i>                         | 1                      | Chamaephyte         | 245.5                         | 22.6                                       | 69.00                           | 5                    |
| <i>Viola riviniana</i>                              | 18                     | Hemicryptophyte     | 175.7                         | 29.7                                       | 430.82                          | 7                    |

**Table S2.** Pearson's correlation values between the functional traits studied (Leaf size and Plant height are not transformed). Significant correlations ( $p < 0.05$ ; 50 d.f.) are marked in shaded numbers.

|                         | Leaf Dry Matter Content | Specific Leaf Area | Leaf size | Plant height |
|-------------------------|-------------------------|--------------------|-----------|--------------|
| Leaf Dry Matter Content | <b>1</b>                | -0.576             | -0.012    | 0.481        |
| Specific Leaf Area      | <b>-0.576</b>           | <b>1</b>           | -0.100    | -0.443       |
| Leaf size               | -0.012                  | -0.100             | <b>1</b>  | 0.179        |
| Plant height            | <b>0.481</b>            | <b>-0.443</b>      | 0.179     | <b>1</b>     |

**Table S3.** List of the environmental variables studied with their range, mean and unit.

| Environmental variables   | Range       | Mean | Unit                            |
|---------------------------|-------------|------|---------------------------------|
| altitude                  | 262 - 635   | 391  | m                               |
| slope                     | 6 - 42      | 23   | sexagesimal degrees             |
| moisture                  | 28 - 44     | 36   | % vol                           |
| radiation                 | 0.03 - 0.61 | 0.17 | .                               |
| CV moisture               | 0.09 - 0.37 | 0.22 | .                               |
| CV radiation              | 0.03 - 0.99 | 0.26 | .                               |
| leaf litter               | 10 - 98     | 69   | percentage                      |
| <i>Quercus</i> basal area | 0 - 97      | 16   | percentage                      |
| basal area                | 6 - 115     | 48   | m <sup>2</sup> ha <sup>-1</sup> |
| DBH mean                  | 8 - 80      | 41   | cm                              |

**Table S4.** Pearson's correlation values between the environmental variables studied and the two axes scores of the taxonomic ordination analysis. Significant correlations ( $p < 0.05$ ; 84 d.f.) are marked in shaded numbers.

| Environmental variables           | Species composition |               |
|-----------------------------------|---------------------|---------------|
|                                   | NMDS1               | NMDS2         |
| altitude                          | 0.095               | <b>-0.299</b> |
| slope                             | 0.192               | 0.135         |
| moisture                          | <b>0.269</b>        | <b>-0.264</b> |
| radiation                         | <b>-0.439</b>       | <b>0.513</b>  |
| CV moisture                       | 0.085               | 0.073         |
| CV radiation                      | 0.145               | <b>0.219</b>  |
| leaf litter                       | <b>0.342</b>        | <b>-0.430</b> |
| <i>Quercus</i> basal area         | <b>-0.292</b>       | <b>0.313</b>  |
| basal area                        | 0.121               | -0.104        |
| DBH mean                          | 0.160               | -0.057        |
| <b>Herb-layer characteristics</b> |                     |               |
| species richness                  | 0.157               | <b>0.696</b>  |

**Table S5.** Pearson's correlation values between taxonomic composition (expressed as the axes scores obtained from the NMDS) and species richness, and functional composition (CWM), Standardized Effect Size of functional richness (SESFRic) and diversity (SES Rao) indices for each trait (LDMC: Leaf Dry Matter Content, SLA: Specific Leaf Area, Leaf size, Plant height). Significant correlations ( $p < 0.05$ ; 84 d.f.) are marked in shaded numbers.

| Traits         | Species composition |               | Species richness |
|----------------|---------------------|---------------|------------------|
|                | NMDS1               | NMDS2         |                  |
| <i>CWM</i>     |                     |               |                  |
| LDMC           | -0.644              | -0.005        | -0.003           |
| SLA            | 0.669               | -0.039        | -0.025           |
| Leaf Size      | <b>0.756</b>        | -0.127        | 0.041            |
| Height         | 0.426               | 0.102         | 0.006            |
| <i>SESFRic</i> |                     |               |                  |
| LDMC           | -0.138              | -0.076        | -0.029           |
| SLA            | <b>0.382</b>        | <b>-0.302</b> | 0.040            |
| Leaf Size      | <b>-0.347</b>       | -0.072        | -0.057           |
| Height         | 0.095               | 0.112         | -0.082           |
| <i>SES Rao</i> |                     |               |                  |
| LDMC           | <b>-0.230</b>       | 0.013         | -0.139           |
| SLA            | <b>0.271</b>        | 0.044         | 0.073            |
| Leaf size      | -0.203              | <b>0.231</b>  | 0.095            |
| Height         | <b>0.255</b>        | 0.106         | 0.200            |

**Table S6.** Pearson's correlation values between the environmental variables studied. Significant correlations ( $p < 0.05$ ; 84 d.f.) are marked in shaded numbers.

|                           | altitude     | slope         | moisture      | radiation     | CV moisture | CV radiation  | leaf litter   | <i>Quercus</i> basal area | basal area   | DBH mean |
|---------------------------|--------------|---------------|---------------|---------------|-------------|---------------|---------------|---------------------------|--------------|----------|
| altitude                  | <b>1</b>     | -0.013        | -0.174        | -0.018        | 0.296       | 0.080         | 0.073         | -0.177                    | 0.076        | 0.098    |
| slope                     | -0.013       | <b>1</b>      | -0.261        | -0.059        | -0.014      | 0.094         | -0.074        | 0.291                     | 0.023        | -0.046   |
| moisture                  | -0.174       | <b>-0.261</b> | <b>1</b>      | -0.395        | -0.204      | -0.006        | 0.249         | -0.395                    | 0.058        | 0.047    |
| radiation                 | -0.018       | -0.059        | <b>-0.395</b> | <b>1</b>      | 0.039       | -0.029        | -0.513        | 0.389                     | -0.191       | -0.061   |
| CV moisture               | <b>0.296</b> | -0.014        | -0.204        | 0.039         | <b>1</b>    | 0.145         | -0.074        | 0.044                     | -0.088       | -0.094   |
| CV radiation              | 0.080        | 0.094         | -0.006        | -0.029        | 0.145       | <b>1</b>      | 0.070         | -0.047                    | -0.093       | -0.217   |
| leaf litter               | 0.073        | -0.074        | <b>0.249</b>  | <b>-0.513</b> | -0.074      | 0.070         | <b>1</b>      | -0.311                    | 0.191        | 0.002    |
| <i>Quercus</i> basal area | -0.177       | <b>0.291</b>  | <b>-0.395</b> | <b>0.389</b>  | 0.044       | -0.047        | <b>-0.311</b> | <b>1</b>                  | -0.006       | -0.108   |
| basal area                | 0.076        | 0.023         | 0.058         | -0.191        | -0.088      | -0.093        | 0.191         | -0.006                    | <b>1</b>     | 0.326    |
| DBH mean                  | 0.098        | -0.046        | 0.047         | -0.061        | -0.094      | <b>-0.217</b> | 0.002         | -0.108                    | <b>0.326</b> | <b>1</b> |

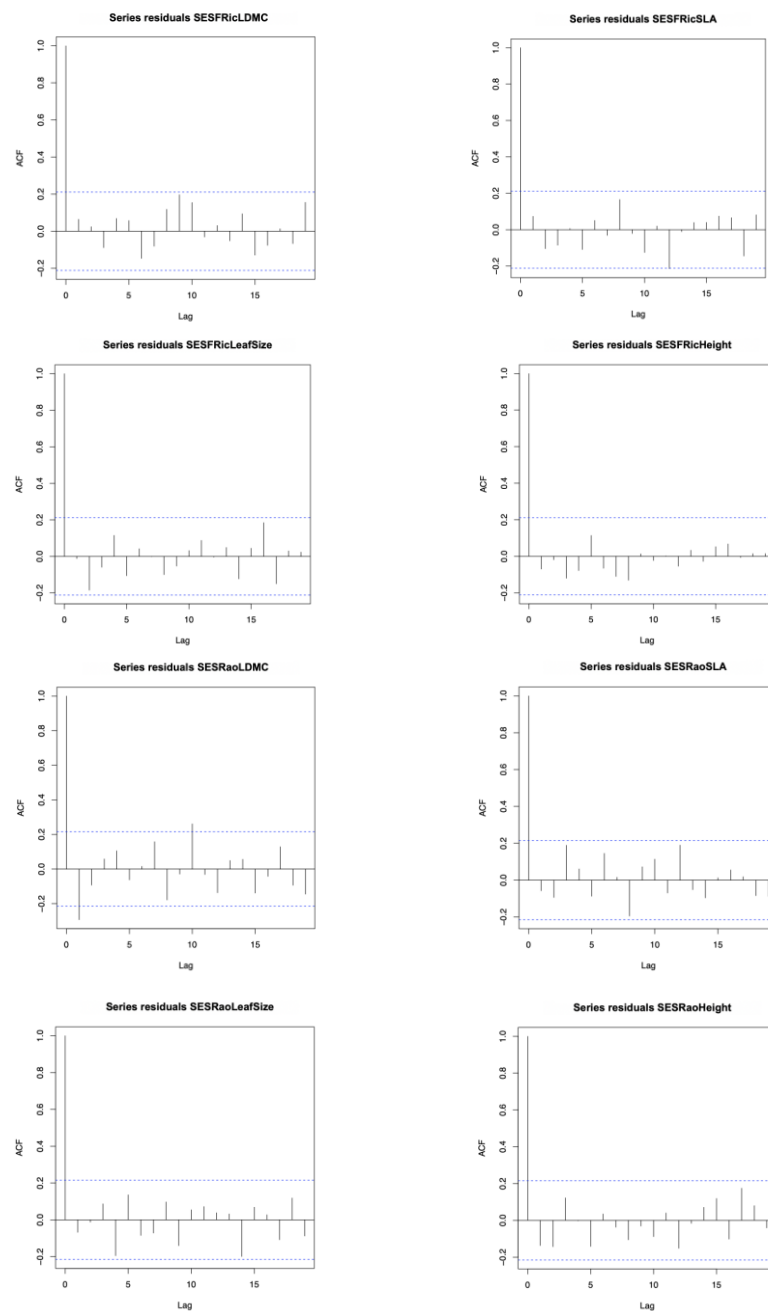

**Figure S1.** Autocorrelation plots showing the spatial autocorrelation of the residuals obtained from 8 of the multiple regression models carried out in the study. The models had as response variable the SESFRic or SESRao of the four traits studied (Leaf Dry Matter Content, Specific Leaf Area, Leaf size and Plant height), and as explanatory variables different environmental variables (see Table 1). Blue dashed lines show the confidence interval beyond which the spatial autocorrelation is significant.

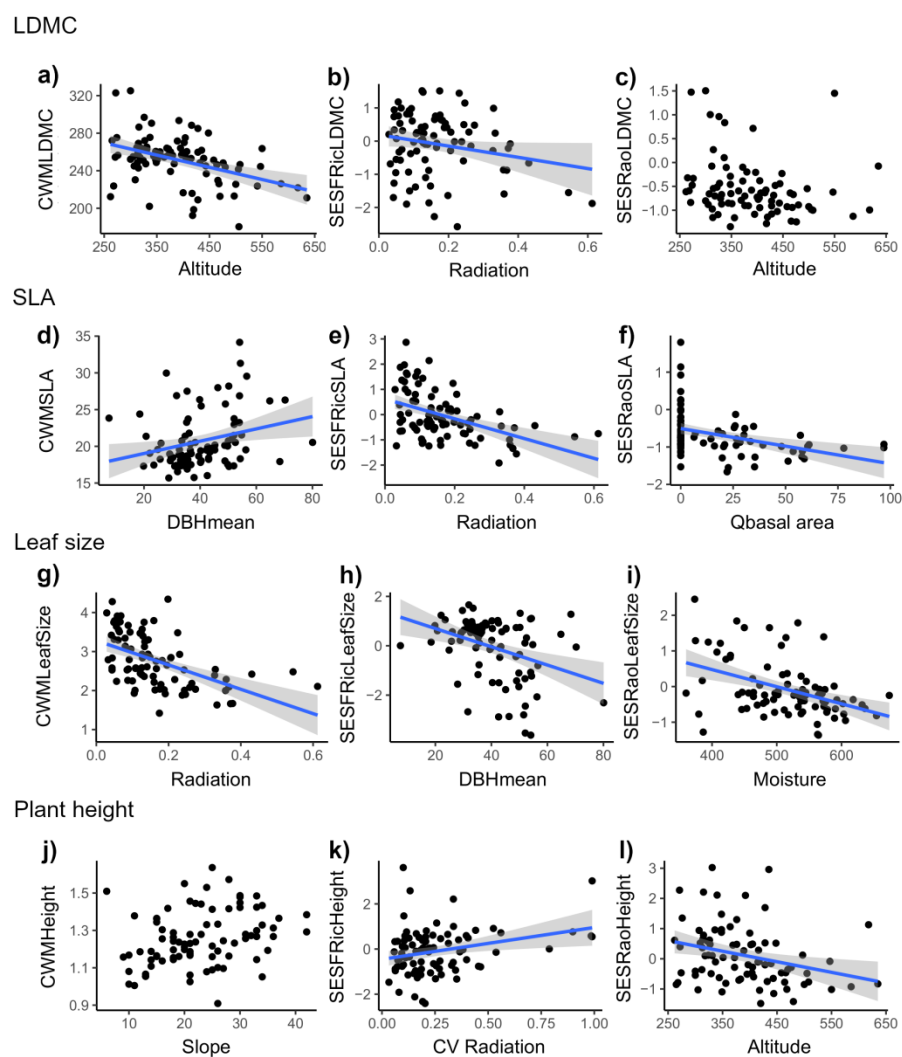

**Figure S2.** Scatter plot representing relationships between the functional composition (CWM), Standardized Effect Size of functional richness (SEsFRic) and diversity (SEsRao) of the traits studied (LDMC: Leaf Dry Matter Content (a–c), SLA: Specific Leaf Area (d–f), Leaf size (g–i), and Plant height (j–l)), and the most influential environmental factors in each case. Regression lines with the confidence interval (0.95) show significant relationships ( $p < 0.05$ ). Each circle represents one community (86 for CWM and SEsFRic, and 83 for SEsRao).
